# Supplementary material for: Raltitrexed regulates proliferation and apoptosis of HGC-27 cells by upregulating RSK4
Source: PubMed Central journal article supplement (PMC9420250; doi:10.1186/s40360-022-00605-2), 2022-08-28

original images

Figure 1B Raltitrexed upregulated the protein level of RSK4.

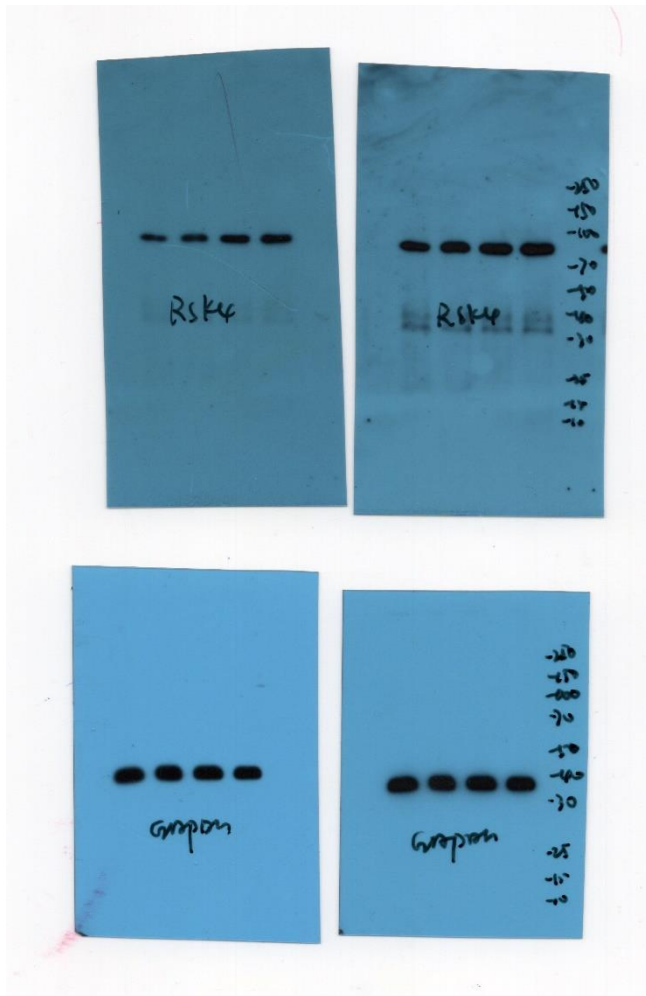

Figure 6A Raltitrexed regulated expressions of cell cycle- and apoptosis-related by increasing RSK4.

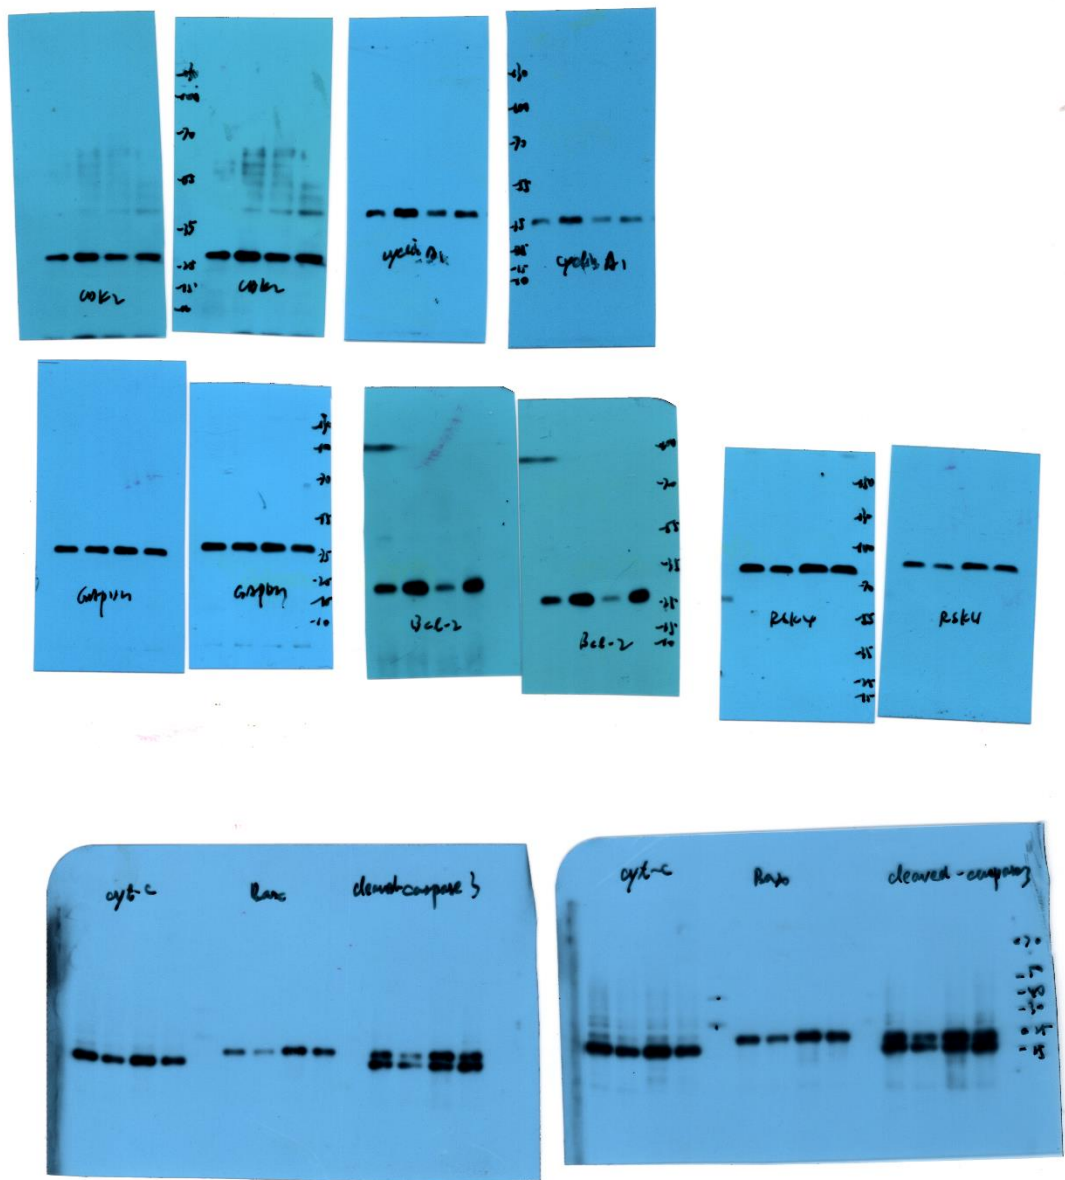

Supplement: 40360_2022_605_MOESM1_ESM.pdf [file 40360_2022_605_MOESM1_ESM.pdf]
